# Supplementary material for: Influence of surfactant on glass transition temperature of poly(lactic-co-glycolic acid) nanoparticles
Source: Royal Society of Chemistry journal article supplement (doi:10.1039/d3sm00082f), 2023-01-01
Supplement: d3sm00082f1.pdf [file d3sm00082f1.pdf]

Electronic Supplementary Information For:  
Influence of Surfactant on Glass Transition Temperature of  
Poly(lactic-co-glycolic acid) Nanoparticles

Guangliang Liu, Roberto Martinez, Anika Bhatnagar and Kathleen McEnnis \*

Otto H. York Department of Chemical and Materials Engineering, New Jersey  
Institute of Technology, Newark, NJ 07102, USA

\* Corresponding author email: [mcennis@njit.edu](mailto:mcennis@njit.edu)

## **Intrinsic viscosity measurement of PLGA samples**

The intrinsic viscosity was applied to evaluate whether significant degradation was occurring during the DSC measurements and the effect of this potential molecular weight change on the glass transition temperature before and after DSC measurements using the Mark-Houwink equation.<sup>1</sup> Intrinsic viscosity measurements allow us to determine if the potential degradation of PLGA in wet conditions and high temperature has a significant influence on  $T_g$ . To eliminate the influence of the second component (surfactant) on intrinsic viscosity, non-surfactant PLGA particles was prepared and dissolved in chloroform. The experiment was done in ice water which provided consistent temperature and avoided excessive evaporation of chloroform. The principle of intrinsic viscosity is based on the Mark-Houwink relation according to equation (1):

$$[\eta] = K \cdot M_w^\alpha \quad (1)$$

Where  $\alpha = 0.73$ ,<sup>2</sup>  $K$  is calculated from the known molecular weight of non-surfactant PLGA particles and the accordingly measured intrinsic viscosity, which resulted in a value of  $2.275 \times 10^{-4}$ .

## **Preparation of non-surfactant PLGA nanoparticles**

20 mg of PLGA was weighed and dissolved in 2 ml of acetone solution to create the organic phase and injected into 100 of ultra-pure water. The mixture was stirred overnight to evaporate the organic solvent and the sample was collected with 40  $\mu\text{m}$  cell strainers to remove the large chunks of aggregated polymer. The collected samples were frozen at  $-80^\circ\text{C}$  and freeze dried to get nanoparticles.

## **Intrinsic viscosity measurement**

Different amounts of non-surfactant PLGA particles (5 mg, 10 mg, 15 mg, and 20 mg) were dissolved in chloroform to create varying concentrations of PLGA-chloroform solution. The intrinsic viscosity measurement was performed with an Ubbelohde viscometer (Fisher Scientific catalog# 13614F). According to Figure S1, intrinsic viscosity of PLGA particles at 0°C before  $T_g$  measurement was 0.6127 dL/g, which was set as reference to calculate the K value using the known molecular weight of the PLGA as 50,000 g/mol. The intrinsic viscosities of DSC treated PLGA particles (dry condition and wet condition) were 0.4532 dL/g and 0.4287 dL/g, respectively, which gave molecular weights of 33,100 and 30,100 g/mol.

It has been reported that when the molecular weight of PLGA is higher than 10,000 g/mol, the  $T_g$  remains stable despite changes in the molecular weight.<sup>3</sup> The decrease in molecular weight in samples after DSC measurement indicate that the DSC treated PLGA particles experienced some chain-scission during  $T_g$  measurement, however the degree of degradation of PLGA chains is minor and not significant enough to shift the  $T_g$ . Also, the Gordon-Taylor equation suggested that the effect of molecular weight on  $T_{g,max}$  is negligible when it's large than 20 kDa.<sup>4</sup> As a conclusion, we can confirm that the  $T_g$  change before and after DSC scans was not caused by the degradation of PLGA chains.

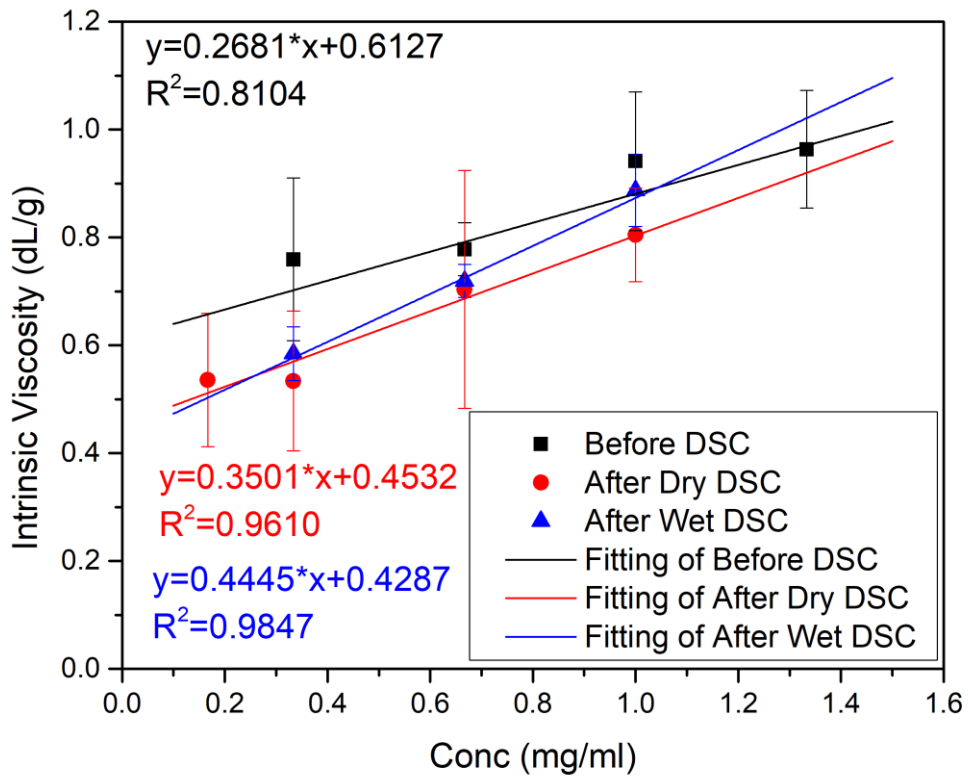

Figure S1 Intrinsic viscosity of non-surfactant PLGA nanoparticles before DSC scan (black square), after DSC scan in dry condition (red circle), and after DSC scan in wet condition (blue triangle), and their fitting lines as measured at 0°C.

## One-way ANOVA: PVA-PLGA NP diameter vs. initial concentration

### Method

Null hypothesis All means are equal

Alternative hypothesis Not all means are equal

Significance level  $\alpha = 0.05$

Equal variances were assumed for the analysis.

### Factor Information

| Factor | Levels | Values                      |
|--------|--------|-----------------------------|
| Factor | 5      | 0.50%, 1%, 1.50%, 2%, 2.50% |

### Analysis of Variance

| Source | DF | Adj SS | Adj MS  | F-Value | P-Value |
|--------|----|--------|---------|---------|---------|
| Factor | 4  | 8178   | 2044.45 | 119.26  | 0.000   |
| Error  | 70 | 1200   | 17.14   |         |         |
| Total  | 74 | 9378   |         |         |         |

### Model Summary

| S       | R-sq   | R-sq(adj) | R-sq(pred) |
|---------|--------|-----------|------------|
| 4.14042 | 87.20% | 86.47%    | 85.31%     |

### Means

| Factor | N  | Mean    | StDev | 95% CI             |
|--------|----|---------|-------|--------------------|
| 0.50%  | 15 | 146.37  | 4.50  | (144.24, 148.51)   |
| 1%     | 15 | 136.02  | 4.11  | (133.89, 138.15)   |
| 1.50%  | 15 | 125.093 | 2.998 | (122.961, 127.225) |
| 2%     | 15 | 120.75  | 5.19  | (118.62, 122.89)   |
| 2.50%  | 15 | 118.447 | 3.560 | (116.315, 120.579) |

Pooled StDev = 4.14042

### Tukey Pairwise Comparisons

#### Grouping Information Using the Tukey Method and 95% Confidence

| Factor | N  | Mean    | Grouping |   |   |   |
|--------|----|---------|----------|---|---|---|
| 0.50%  | 15 | 146.37  | A        |   |   |   |
| 1%     | 15 | 136.02  |          | B |   |   |
| 1.50%  | 15 | 125.093 |          |   | C |   |
| 2%     | 15 | 120.75  |          |   |   | D |
| 2.50%  | 15 | 118.447 |          |   |   | D |

Means that do not share a letter are significantly different.

Figure S2 Single Factor ANOVA analysis of PVA-PLGA particle diameter and initial PVA concentration. Equal variances were assumed for the analysis according to

the results of a multiple comparisons test for equal variance.

One-way ANOVA: DMAB-PLGA NP diameter vs. initial concentration

**Method**

Null hypothesis All means are equal  
 Alternative hypothesis Not all means are equal  
 Significance level  $\alpha = 0.05$   
 Equal variances were assumed for the analysis.

**Factor Information**

| Factor | Levels | Values                            |
|--------|--------|-----------------------------------|
| Factor | 5      | 0.25%, 0.50%, 1.00%, 1.50%, 2.00% |

**Analysis of Variance**

| Source | DF | Adj SS | Adj MS | F-Value | P-Value |
|--------|----|--------|--------|---------|---------|
| Factor | 4  | 29710  | 7427.6 | 13.25   | 0.000   |
| Error  | 70 | 39231  | 560.4  |         |         |
| Total  | 74 | 68942  |        |         |         |

**Model Summary**

| S       | R-sq   | R-sq(adj) | R-sq(pred) |
|---------|--------|-----------|------------|
| 23.6738 | 43.09% | 39.84%    | 34.68%     |

**Means**

| Factor | N  | Mean   | StDev | 95% CI           |
|--------|----|--------|-------|------------------|
| 0.25%  | 15 | 140.07 | 25.86 | (127.88, 152.26) |
| 0.50%  | 15 | 157.06 | 23.79 | (144.87, 169.25) |
| 1.00%  | 15 | 166.05 | 22.51 | (153.86, 178.24) |
| 1.50%  | 15 | 107.77 | 19.15 | (95.58, 119.96)  |
| 2.00%  | 15 | 140.92 | 26.35 | (128.73, 153.11) |

Pooled StDev = 23.6738

**Tukey Pairwise Comparisons**

**Grouping Information Using the Tukey Method and 95% Confidence**

| Factor | N  | Mean   | Grouping |   |   |
|--------|----|--------|----------|---|---|
| 1.00%  | 15 | 166.05 | A        |   |   |
| 0.50%  | 15 | 157.06 | A        | B |   |
| 2.00%  | 15 | 140.92 |          | B |   |
| 0.25%  | 15 | 140.07 |          | B |   |
| 1.50%  | 15 | 107.77 |          |   | C |

Means that do not share a letter are significantly different.

Figure S3 Single Factor ANOVA analysis of DMAB-PLGA particle diameter and

initial DMAB concentration. Equal variances were assumed for the analysis according to the results of a multiple comparisons test for equal variance.

One-way ANOVA:  $T_g$  of PVA-PLGA Dry-NPs vs. residual PVA

**Method**

Null hypothesis            All means are equal  
 Alternative hypothesis   Not all means are equal  
 Significance level         $\alpha = 0.05$

Equal variances were assumed for the analysis.

**Factor Information**

| Factor | Levels | Values                                 |
|--------|--------|----------------------------------------|
| Factor | 5      | 0.0542, 0.0645, 0.0697, 0.0826, 0.0872 |

**Analysis of Variance**

| Source | DF | Adj SS | Adj MS | F-Value | P-Value |
|--------|----|--------|--------|---------|---------|
| Factor | 4  | 2.164  | 0.5410 | 3.98    | 0.035   |
| Error  | 10 | 1.360  | 0.1360 |         |         |
| Total  | 14 | 3.524  |        |         |         |

**Model Summary**

| S        | R-sq   | R-sq(adj) | R-sq(pred) |
|----------|--------|-----------|------------|
| 0.368755 | 61.41% | 45.97%    | 13.17%     |

**Means**

| Factor | N | Mean    | StDev  | 95% CI             |
|--------|---|---------|--------|--------------------|
| 0.0542 | 3 | 49.1800 | 0.0400 | (48.7056, 49.6544) |
| 0.0645 | 3 | 49.7000 | 0.1058 | (49.2256, 50.1744) |
| 0.0697 | 3 | 49.993  | 0.367  | (49.519, 50.468)   |
| 0.0826 | 3 | 50.327  | 0.454  | (49.852, 50.801)   |
| 0.0872 | 3 | 49.677  | 0.571  | (49.202, 50.151)   |

Pooled StDev = 0.368755

**Tukey Pairwise Comparisons**

**Grouping Information Using the Tukey Method and 95% Confidence**

| Factor | N | Mean    | Grouping |
|--------|---|---------|----------|
| 0.0826 | 3 | 50.327  | A        |
| 0.0697 | 3 | 49.993  | A B      |
| 0.0645 | 3 | 49.7000 | A B      |
| 0.0872 | 3 | 49.677  | A B      |
| 0.0542 | 3 | 49.1800 | B        |

Means that do not share a letter are significantly different.

Figure S4 Single Factor ANOVA analysis of  $T_g$  of PVA-PLGA dry particles and residual PVA. Equal variances were assumed for the analysis according to the results of a multiple comparisons test for equal variance.



## One-way ANOVA: $T_g$ of DMAB-PLGA Dry-NPs vs. residual DMAB

### Method

Null hypothesis All means are equal

Alternative hypothesis Not all means are equal

Significance level  $\alpha = 0.05$

Equal variances were assumed for the analysis.

### Factor Information

| Factor | Levels | Values                                 |
|--------|--------|----------------------------------------|
| Factor | 5      | 0.0462, 0.0447, 0.0508, 0.0592, 0.0866 |

### Analysis of Variance

| Source | DF | Adj SS | Adj MS  | F-Value | P-Value |
|--------|----|--------|---------|---------|---------|
| Factor | 4  | 0.1551 | 0.03878 | 0.19    | 0.936   |
| Error  | 10 | 2.0067 | 0.20067 |         |         |
| Total  | 14 | 2.1618 |         |         |         |

### Model Summary

| S        | R-sq  | R-sq(adj) | R-sq(pred) |
|----------|-------|-----------|------------|
| 0.447966 | 7.17% | 0.00%     | 0.00%      |

### Means

| Factor | N | Mean    | StDev  | 95% CI             |
|--------|---|---------|--------|--------------------|
| 0.0462 | 3 | 49.9233 | 0.1150 | (49.3471, 50.4996) |
| 0.0447 | 3 | 49.997  | 0.550  | (49.420, 50.573)   |
| 0.0508 | 3 | 49.867  | 0.808  | (49.290, 50.443)   |
| 0.0592 | 3 | 49.847  | 0.187  | (49.270, 50.423)   |
| 0.0866 | 3 | 50.1267 | 0.0208 | (49.5504, 50.7029) |

Pooled StDev = 0.447966

### Tukey Pairwise Comparisons

#### Grouping Information Using the Tukey Method and 95% Confidence

| Factor | N | Mean    | Grouping |
|--------|---|---------|----------|
| 0.0866 | 3 | 50.1267 | A        |
| 0.0447 | 3 | 49.997  | A        |
| 0.0462 | 3 | 49.9233 | A        |
| 0.0508 | 3 | 49.867  | A        |
| 0.0592 | 3 | 49.847  | A        |

Means that do not share a letter are significantly different.

Figure S5 Single Factor ANOVA analysis of  $T_g$  of DMAB-PLGA dry particles and residual DMAB. Equal variances were assumed for the analysis according to the

results of a multiple comparisons test for equal variance.

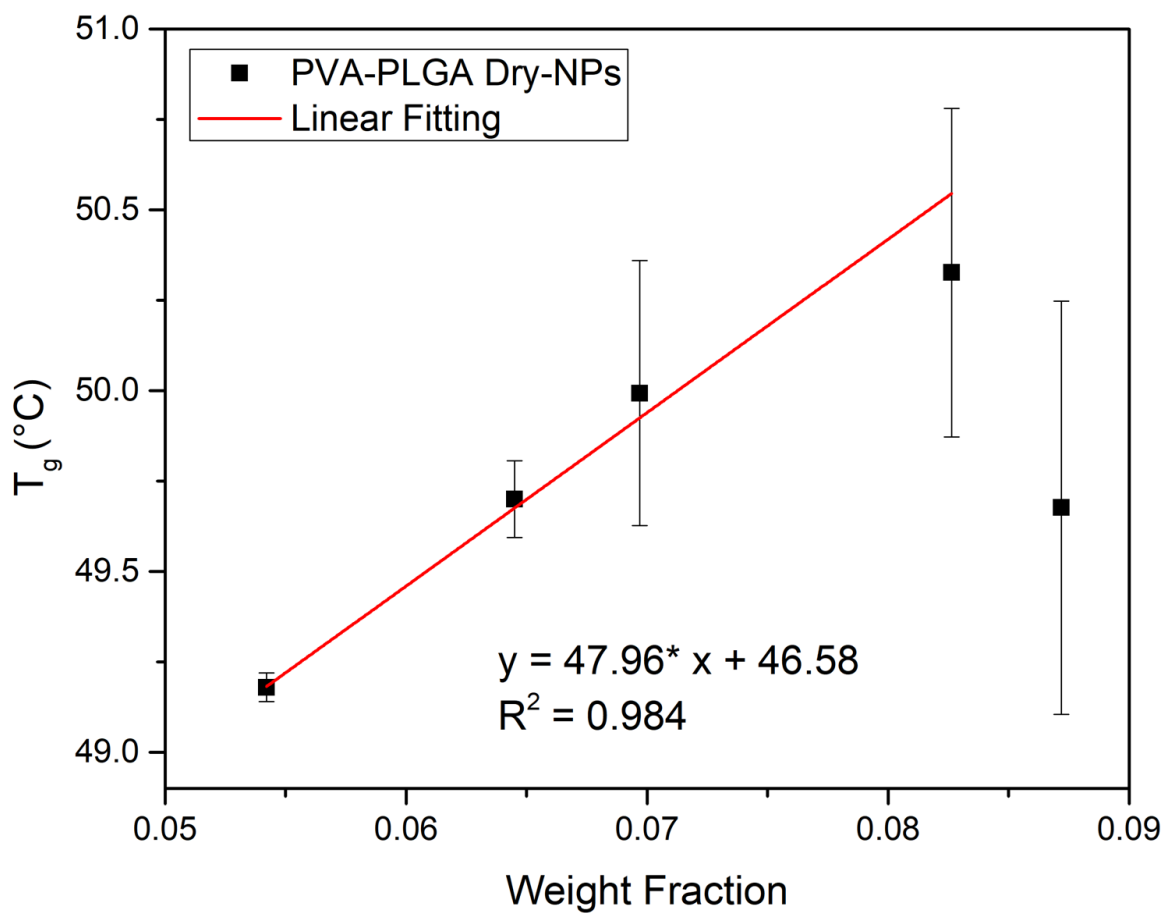

Figure S6  $T_g$  of PVA-PLGA dry particles as a function of residual PVA. The red fitting line of the first four data points shows the increase trend.
